# Supplementary material for: A two-step immunoassay for the simultaneous assessment of Aβ38, Aβ40 and Aβ42 in human blood plasma supports the Aβ42/Aβ40 ratio as a promising biomarker candidate of Alzheimer’s disease
Source: Springer Nature journal article supplement (doi:10.1186/s13195-018-0448-x), 2018-12-01
Supplement: MOESM5 [file 16327396]

**Additional file 5:**

Baseline statistics of the measured A $\beta$ 38, A $\beta$ 40 and A $\beta$ 42 levels in the diluted IP-eluates and the concentration ratios  
A $\beta$ 42/A $\beta$ 40, A $\beta$ 42/A $\beta$ 38 and A $\beta$ 38/A $\beta$ 40

|                           | N  | Min    | 1st Quantile | Median | Mean   | 3rd Quantile | Max    | SD    | P-value<br>normality test | P-value normality<br>test (log2) |
|---------------------------|----|--------|--------------|--------|--------|--------------|--------|-------|---------------------------|----------------------------------|
| A $\beta$ 42              | 40 | 25.76  | 29.44        | 36.08  | 36.40  | 40.84        | 57.37  | 8.10  | 0.027                     | 0.232                            |
| A $\beta$ 40              | 40 | 290.22 | 340.00       | 394.73 | 406.47 | 460.06       | 659.34 | 86.40 | 0.025                     | 0.358                            |
| A $\beta$ 38              | 40 | 50.57  | 66.23        | 74.56  | 78.31  | 90.23        | 120.09 | 16.02 | 0.117                     | 0.681                            |
| A $\beta$ 42/A $\beta$ 40 | 40 | 0.07   | 0.08         | 0.09   | 0.09   | 0.10         | 0.11   | 0.01  | 0.167                     | 0.500                            |
| A $\beta$ 42/A $\beta$ 38 | 40 | 0.36   | 0.43         | 0.45   | 0.47   | 0.51         | 0.58   | 0.06  | 0.251                     | 0.453                            |
| A $\beta$ 38/A $\beta$ 40 | 40 | 0.17   | 0.18         | 0.19   | 0.19   | 0.20         | 0.23   | 0.01  | 0.445                     | 0.655                            |
