# Supplementary material for: A two-step immunoassay for the simultaneous assessment of Aβ38, Aβ40 and Aβ42 in human blood plasma supports the Aβ42/Aβ40 ratio as a promising biomarker candidate of Alzheimer’s disease
Source: Springer Nature journal article supplement (doi:10.1186/s13195-018-0448-x), 2018-12-01
Supplement: MOESM6 [file 16327396]

**Additional file 6**

**Comparison of the measured A $\beta$  levels and A $\beta$ -ratios in IP-eluates from plasma between the diagnostic groups**

|                           | AD-D  |        |       | OD    |        |       | P-value* |
|---------------------------|-------|--------|-------|-------|--------|-------|----------|
|                           | Mean  | Median | SD    | Mean  | Median | SD    |          |
| A $\beta$ 42 (pg/mL)      | 35.6  | 33.9   | 9.0   | 37.5  | 36.6   | 6.8   | 0.321    |
| A $\beta$ 40 (pg/mL)      | 421.6 | 402.7  | 90.2  | 386.0 | 373.6  | 78.9  | 0.189    |
| A $\beta$ 38 (pg/mL)      | 79.9  | 81.6   | 16.4  | 76.2  | 72.9   | 15.7  | 0.486    |
| A $\beta$ 42/A $\beta$ 40 | 0.084 | 0.085  | 0.007 | 0.098 | 0.097  | 0.010 | 2.37E-05 |
| A $\beta$ 42/A $\beta$ 38 | 0.444 | 0.436  | 0.044 | 0.497 | 0.508  | 0.055 | 0.0031   |
| A $\beta$ 38/A $\beta$ 40 | 0.190 | 0.193  | 0.010 | 0.198 | 0.196  | 0.015 | 0.0785   |

\*unpaired t-test for differences between the two diagnostic categories.
