# Supplementary material for: A two-step immunoassay for the simultaneous assessment of Aβ38, Aβ40 and Aβ42 in human blood plasma supports the Aβ42/Aβ40 ratio as a promising biomarker candidate of Alzheimer’s disease
Source: Springer Nature journal article supplement (doi:10.1186/s13195-018-0448-x), 2018-12-01
Supplement: MOESM7 [file 16327396]

## Additional file 7

### Summary of ROC analysis results

| Parameter tested          | A $\beta$ 38   | A $\beta$ 40   | A $\beta$ 42   | ratio A $\beta$ 42/40 | ratio A $\beta$ 42/38 | ratio A $\beta$ 38/40 |
|---------------------------|----------------|----------------|----------------|-----------------------|-----------------------|-----------------------|
| AUC                       | 0.573          | 0.627          | 0.591          | 0.872                 | 0.801                 | 0.661                 |
| Standard error*           | 0.093          | 0.090          | 0.091          | 0.058                 | 0.076                 | 0.091                 |
| 95% Confidence interval   | 0.390 to 0.756 | 0.450 to 0.804 | 0.413 to 0.769 | 0.759 to 0.986        | 0.651 to 0.950        | 0.484 to 0.839        |
| P value                   | 0.436          | 0.176          | 0.331          | <0.0001               | 0.0013                | 0.085                 |
| Threshold                 | 76.44          | 397.26         | 31.68          | 0.09                  | 0.474                 | 0.196                 |
| Specificity               | 0.706          | 0.706          | 0.882          | 0.765                 | 0.765                 | 0.588                 |
| Sensitivity               | 0.609          | 0.609          | 0.435          | 0.913                 | 0.826                 | 0.739                 |
| Accuracy                  | 0.650          | 0.650          | 0.625          | 0.85                  | 0.800                 | 0.675                 |
| True positive             | 14             | 14             | 10             | 21                    | 19                    | 17                    |
| False positive            | 5              | 5              | 2              | 4                     | 4                     | 7                     |
| False negative            | 9              | 9              | 13             | 2                     | 4                     | 6                     |
| True negative             | 12             | 12             | 15             | 13                    | 13                    | 10                    |
| Negative predictive value | 0.571          | 0.571          | 0.536          | 0.867                 | 0.765                 | 0.625                 |
| Positive predictive value | 0.737          | 0.737          | 0.833          | 0.840                 | 0.826                 | 0.708                 |

\*The standard error of the AUC is calculated by the Prism software according to Hanley JA, McNeil BJ, Radiology 1982, 143 29-36 (cited in: URL: <https://www.graphpad.com/guides/prism/6/statistics>, accessed: 2018-10-08).
