# Supplementary material for: A two-step immunoassay for the simultaneous assessment of Aβ38, Aβ40 and Aβ42 in human blood plasma supports the Aβ42/Aβ40 ratio as a promising biomarker candidate of Alzheimer’s disease
Source: Springer Nature journal article supplement (doi:10.1186/s13195-018-0448-x), 2018-12-01
Supplement: MOESM8 [file 16327396]

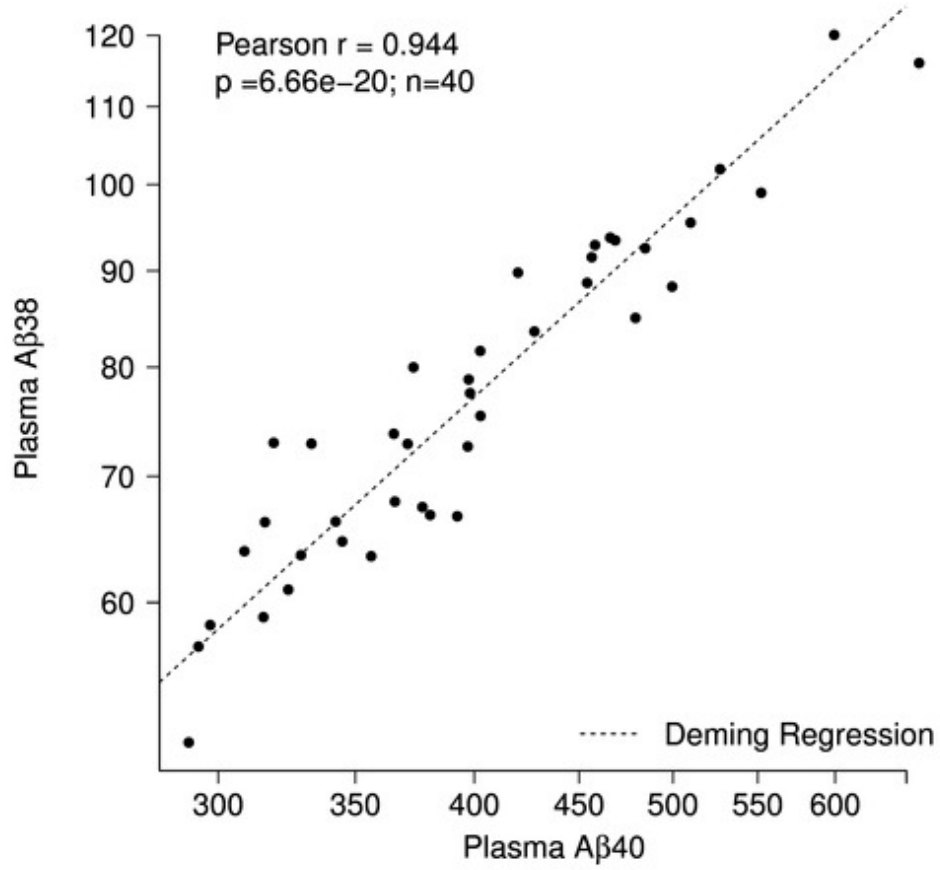

Additional file 8: The concentrations of Aβ38 and Aβ40 in the IP-eluates were strongly correlated with each other.
