# Supplementary material for: A two-step immunoassay for the simultaneous assessment of Aβ38, Aβ40 and Aβ42 in human blood plasma supports the Aβ42/Aβ40 ratio as a promising biomarker candidate of Alzheimer’s disease
Source: Springer Nature journal article supplement (doi:10.1186/s13195-018-0448-x), 2018-12-01
Supplement: MOESM9 [file 16327396]

**A**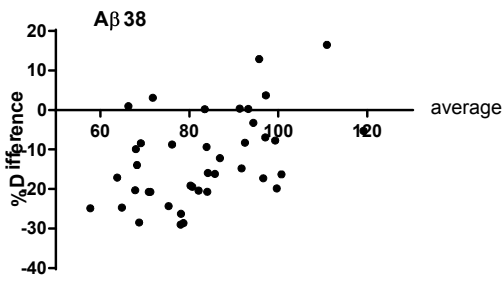**B**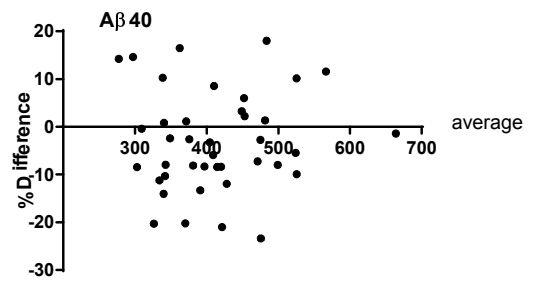**C**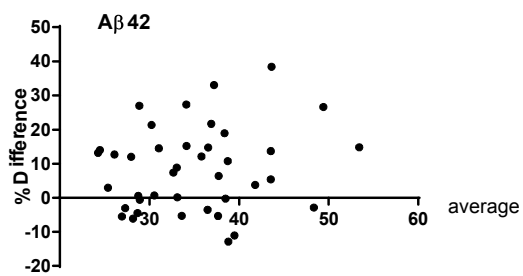**D**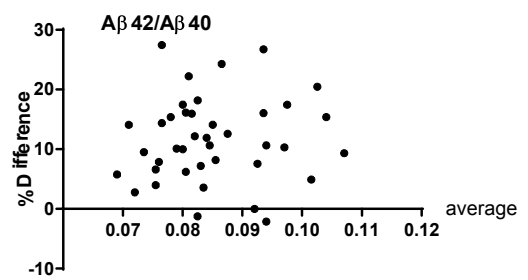**E**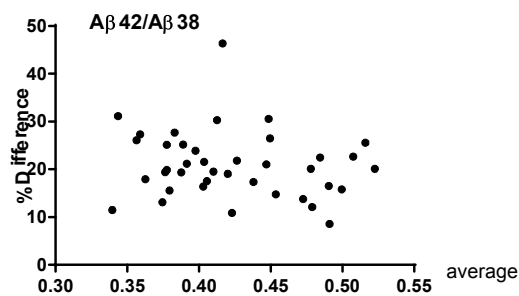**F**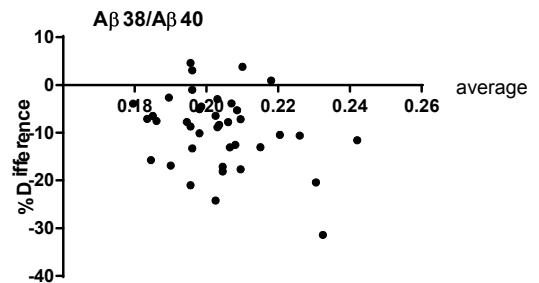

**Additional file 9:** Bland-Altman plots suggest systematic variations between two independent two-step immunoassay experiments. The relative differences between two experiments in the measured levels of A) A $\beta$ 38, B) A $\beta$ 40, C) A $\beta$ 42 and the ratios D) A $\beta$ 42/A $\beta$ 40, E) A $\beta$ 42/A $\beta$ 38 and F) A $\beta$ 38/A $\beta$ 40 were plotted against the respective averages.
